# Supplementary material
Source: HighWire-hosted journal article supplement (https://ard.bmj.com/content/78/6/826)
Supplement: inline-supplementary-material-13 [file inline-supplementary-material-13.docx]

| Supplementary Table S2 | | | | |
| --- | --- | --- | --- | --- |
| ID | log2FC(OA/Control) | pvalue | significant | regulate |
| hsa-miR-483-3p | 11.56 | 1.56E-40 | yes | up |
| hsa-miR-549a | 10.98 | 4.54E-29 | yes | up |
| hsa-miR-4709-5p | 9.67 | 2.20E-13 | yes | up |
| hsa-miR-483-5p | 9.47 | 5.98E-12 | yes | up |
| hsa-miR-486-3p | 9.39 | 1.71E-11 | yes | up |
| hsa-miR-133a-3p | 9.2 | 2.96E-10 | yes | up |
| hsa-miR-4435 | 9.04 | 3.28E-09 | yes | up |
| hsa-miR-6782-3p | 8.97 | 1.01E-08 | yes | up |
| hsa-miR-224-3p | 8.33 | 4.81E-06 | yes | up |
| hsa-miR-3183 | 8.18 | 9.56E-06 | yes | up |
| hsa-miR-1197 | 8.12 | 2.23E-05 | yes | up |
| hsa-miR-2277-3p | 8.04 | 3.54E-05 | yes | up |
| hsa-miR-675-5p | 7.96 | 4.35E-05 | yes | up |
| hsa-miR-548h-5p | 7.81 | 0.0001351 | yes | up |
| hsa-miR-4725-5p | 7.75 | 0.00034645 | yes | up |
| hsa-miR-548ag | 7.65 | 0.00036316 | yes | up |
| hsa-miR-6764-5p | 7.62 | 0.00063384 | yes | up |
| hsa-miR-4665-5p | 7.56 | 0.00040743 | yes | up |
| hsa-miR-3199 | 7.45 | 0.00116054 | yes | up |
| hsa-miR-6735-3p | 7.44 | 0.0010508 | yes | up |
| hsa-miR-660-3p | 7.43 | 0.00115681 | yes | up |
| hsa-miR-663b | 7.4 | 0.00107938 | yes | up |
| hsa-miR-7113-5p | 7.38 | 0.0012266 | yes | up |
| hsa-miR-4768-5p | 7.38 | 0.00130979 | yes | up |
| hsa-miR-6795-5p | 7.37 | 0.00203 | yes | up |
| hsa-miR-4723-5p | 7.32 | 0.00130066 | yes | up |
| hsa-miR-1245a | 7.32 | 0.00215222 | yes | up |
| hsa-miR-4687-3p | 7.21 | 0.00364786 | yes | up |
| hsa-miR-3065-3p | 7.18 | 0.00363397 | yes | up |
| hsa-miR-7114-5p | 7.13 | 0.00622968 | yes | up |
| hsa-miR-548w | 7.09 | 0.00410646 | yes | up |
| hsa-miR-4706 | 6.97 | 0.00699569 | yes | up |
| hsa-miR-4670-5p | 6.91 | 0.00719079 | yes | up |
| hsa-miR-551a | 6.91 | 0.01203699 | yes | up |
| hsa-miR-942-3p | 6.91 | 0.01203699 | yes | up |
| hsa-miR-5191 | 6.9 | 0.00741995 | yes | up |
| hsa-miR-548ar-3p | 6.89 | 0.01085894 | yes | up |
| hsa-miR-1295a | 6.89 | 0.01161769 | yes | up |
| hsa-miR-6738-3p | 6.85 | 0.01238208 | yes | up |
| hsa-miR-4504 | 6.8 | 0.01274428 | yes | up |
| hsa-miR-3941 | 6.79 | 0.0199991 | yes | up |
| hsa-miR-943 | 6.76 | 0.02065716 | yes | up |
| hsa-miR-548h-3p | 6.75 | 0.0126949 | yes | up |
| hsa-miR-548z | 6.75 | 0.0126949 | yes | up |
| hsa-miR-3917 | 6.75 | 0.02132526 | yes | up |
| hsa-miR-6763-5p | 6.71 | 0.02125391 | yes | up |
| hsa-miR-1273f | 6.69 | 0.02195386 | yes | up |
| hsa-miR-4638-5p | 6.68 | 0.01915819 | yes | up |
| hsa-miR-6787-3p | 6.68 | 0.01915819 | yes | up |
| hsa-miR-4680-3p | 6.67 | 0.02118281 | yes | up |
| hsa-miR-6798-5p | 6.62 | 0.02108838 | yes | up |
| hsa-miR-6721-5p | 6.58 | 0.03675729 | yes | up |
| hsa-miR-6509-3p | 6.56 | 0.03545703 | yes | up |
| hsa-miR-6797-3p | 6.56 | 0.03797739 | yes | up |
| hsa-miR-3189-3p | 6.5 | 0.03908415 | yes | up |
| hsa-miR-6779-3p | 6.5 | 0.03908415 | yes | up |
| hsa-miR-3679-3p | 6.48 | 0.03772163 | yes | up |
| hsa-miR-5581-3p | 6.44 | 0.03634584 | yes | up |
| hsa-miR-598-5p | 6.43 | 0.04024631 | yes | up |
| hsa-miR-6799-3p | 6.43 | 0.04024631 | yes | up |
| hsa-miR-1226-5p | 6.42 | 0.03508007 | yes | up |
| hsa-miR-4286 | 6.42 | 0.03508007 | yes | up |
| hsa-miR-5100 | 6.42 | 0.03508007 | yes | up |
| hsa-miR-656-5p | 6.42 | 0.03508007 | yes | up |
| hsa-miR-4717-3p | 6.42 | 0.03755209 | yes | up |
| hsa-miR-4743-5p | 6.42 | 0.03755209 | yes | up |
| hsa-miR-3157-5p | 6.4 | 0.03622332 | yes | up |
| hsa-miR-548q | 6.4 | 0.03622332 | yes | up |
| hsa-miR-548az-5p | 6.4 | 0.03879896 | yes | up |
| hsa-miR-6882-5p | 6.37 | 0.04008784 | yes | up |
| hsa-miR-616-5p | 6.16 | 2.16E-20 | yes | up |
| hsa-miR-1296-5p | 5.5 | 0 | yes | up |
| hsa-miR-2682-5p | 5.17 | 4.89E-19 | yes | up |
| hsa-miR-6873-3p | 5.1 | 1.75E-10 | yes | up |
| hsa-miR-3117-3p | 4.75 | 1.46E-08 | yes | up |
| hsa-miR-1255b-5p | 4.64 | 1.30E-06 | yes | up |
| hsa-miR-4649-5p | 4.62 | 2.24E-06 | yes | up |
| hsa-miR-4423-3p | 4.2 | 8.97E-29 | yes | up |
| hsa-miR-7977 | 4.15 | 6.10E-05 | yes | up |
| hsa-miR-605-5p | 4.11 | 2.28E-07 | yes | up |
| hsa-miR-1914-5p | 4.06 | 3.73E-07 | yes | up |
| hsa-miR-744-3p | 3.86 | 6.08E-05 | yes | up |
| hsa-miR-665 | 3.82 | 5.50E-28 | yes | up |
| hsa-miR-5091 | 3.81 | 0.00091985 | yes | up |
| hsa-miR-494-3p | 3.7 | 0 | yes | up |
| hsa-miR-1908-3p | 3.64 | 0.00029784 | yes | up |
| hsa-miR-4689 | 3.47 | 0.00285133 | yes | up |
| hsa-miR-6827-5p | 3.46 | 6.00E-05 | yes | up |
| hsa-miR-490-3p | 3.35 | 1.18E-06 | yes | up |
| hsa-miR-144-5p | 3.29 | 6.15E-07 | yes | up |
| hsa-miR-3687 | 3.22 | 6.72E-39 | yes | up |
| hsa-miR-758-3p | 3.18 | 1.21E-198 | yes | up |
| hsa-miR-3622b-3p | 3.15 | 0.01611461 | yes | up |
| hsa-miR-3200-3p | 3.06 | 1.80E-15 | yes | up |
| hsa-miR-770-5p | 3.06 | 6.14E-07 | yes | up |
| hsa-miR-4676-3p | 3.06 | 0.00967374 | yes | up |
| hsa-miR-93-5p | 3.04 | 2.65E-30 | yes | up |
| hsa-let-7c-3p | 3 | 7.18E-57 | yes | up |
| hsa-miR-335-3p | 2.99 | 0 | yes | up |
| hsa-miR-502-5p | 2.93 | 0.02578342 | yes | up |
| hsa-miR-1304-3p | 2.92 | 4.84E-31 | yes | up |
| hsa-miR-454-5p | 2.91 | 3.95E-11 | yes | up |
| hsa-miR-296-3p | 2.9 | 1.96E-42 | yes | up |
| hsa-miR-548ap-5p | 2.82 | 0.00192662 | yes | up |
| hsa-miR-548j-5p | 2.82 | 0.00192662 | yes | up |
| hsa-miR-187-3p | 2.71 | 8.65E-06 | yes | up |
| hsa-miR-641 | 2.66 | 4.00E-16 | yes | up |
| hsa-miR-379-3p | 2.63 | 2.99E-48 | yes | up |
| hsa-miR-99a-3p | 2.63 | 8.65E-27 | yes | up |
| hsa-miR-548av-3p | 2.62 | 8.98E-85 | yes | up |
| hsa-miR-548o-3p | 2.62 | 8.98E-85 | yes | up |
| hsa-miR-940 | 2.45 | 5.15E-07 | yes | up |
| hsa-miR-23b-3p | 2.4 | 0 | yes | up |
| hsa-miR-486-5p | 2.4 | 0 | yes | up |
| hsa-miR-185-5p | 2.39 | 0 | yes | up |
| hsa-miR-1270 | 2.35 | 4.08E-06 | yes | up |
| hsa-miR-654-3p | 2.29 | 0 | yes | up |
| hsa-miR-6753-3p | 2.23 | 0.02701036 | yes | up |
| hsa-miR-411-3p | 2.22 | 1.44E-60 | yes | up |
| hsa-miR-505-3p | 2.19 | 2.87E-116 | yes | up |
| hsa-miR-362-5p | 2.19 | 5.42E-32 | yes | up |
| hsa-miR-550a-3p | 2.17 | 3.83E-06 | yes | up |
| hsa-miR-4728-5p | 2.17 | 0.00493953 | yes | up |
| hsa-miR-4755-5p | 2.17 | 0.0244009 | yes | up |
| hsa-miR-30c-1-3p | 2.16 | 2.77E-06 | yes | up |
| hsa-miR-149-5p | 2.15 | 0 | yes | up |
| hsa-let-7e-3p | 2.12 | 1.25E-86 | yes | up |
| hsa-miR-196a-3p | 2.12 | 3.76E-05 | yes | up |
| hsa-miR-1255a | 2.09 | 1.50E-05 | yes | up |
| hsa-miR-1273g-3p | 2.09 | 0.00194775 | yes | up |
| hsa-miR-30d-5p | 2.05 | 0 | yes | up |
| hsa-miR-7976 | 2.04 | 2.16E-08 | yes | up |
| hsa-miR-3064-5p | 2.03 | 0.04155015 | yes | up |
| hsa-miR-339-5p | 2.01 | 0 | yes | up |
| hsa-miR-3619-5p | 2.01 | 0.02336102 | yes | up |
| hsa-miR-145-5p | 1.97 | 4.73E-134 | yes | up |
| hsa-miR-2277-5p | 1.95 | 1.95E-22 | yes | up |
| hsa-miR-589-3p | 1.89 | 0.0321358 | yes | up |
| hsa-miR-585-3p | 1.87 | 0.01345442 | yes | up |
| hsa-miR-671-5p | 1.8 | 9.87E-31 | yes | up |
| hsa-miR-642a-3p | 1.79 | 3.39E-07 | yes | up |
| hsa-miR-4326 | 1.75 | 9.21E-265 | yes | up |
| hsa-miR-4677-3p | 1.74 | 0.00895593 | yes | up |
| hsa-miR-345-5p | 1.73 | 4.46E-86 | yes | up |
| hsa-miR-576-3p | 1.7 | 0.00048287 | yes | up |
| hsa-miR-4461 | 1.68 | 0.02955339 | yes | up |
| hsa-miR-337-3p | 1.67 | 1.04E-33 | yes | up |
| hsa-miR-491-5p | 1.66 | 5.06E-12 | yes | up |
| hsa-miR-199a-5p | 1.65 | 0 | yes | up |
| hsa-miR-887-3p | 1.65 | 0.00011249 | yes | up |
| hsa-miR-1254 | 1.63 | 1.24E-26 | yes | up |
| hsa-miR-455-3p | 1.62 | 0 | yes | up |
| hsa-let-7f-2-3p | 1.61 | 7.50E-05 | yes | up |
| hsa-miR-4421 | 1.6 | 1.62E-08 | yes | up |
| hsa-miR-10b-3p | 1.57 | 3.86E-19 | yes | up |
| hsa-miR-539-3p | 1.55 | 0.00741344 | yes | up |
| hsa-miR-655-5p | 1.54 | 0.02071168 | yes | up |
| hsa-miR-10b-5p | 1.5 | 0 | yes | up |
| hsa-miR-589-5p | 1.5 | 5.54E-97 | yes | up |
| hsa-miR-342-3p | 1.49 | 9.41E-277 | yes | up |
| hsa-miR-30c-5p | 1.46 | 0 | yes | up |
| hsa-miR-5090 | 1.43 | 0.03437075 | yes | up |
| hsa-miR-576-5p | 1.42 | 2.49E-09 | yes | up |
| hsa-miR-451a | 1.39 | 1.37E-59 | yes | up |
| hsa-miR-500a-5p | 1.38 | 3.19E-06 | yes | up |
| hsa-miR-1271-5p | 1.36 | 2.14E-117 | yes | up |
| hsa-miR-409-5p | 1.34 | 0 | yes | up |
| hsa-miR-361-3p | 1.33 | 3.89E-10 | yes | up |
| hsa-miR-501-5p | 1.32 | 3.67E-09 | yes | up |
| hsa-miR-744-5p | 1.29 | 0 | yes | up |
| hsa-miR-34b-3p | 1.28 | 8.20E-06 | yes | up |
| hsa-miR-130b-5p | 1.27 | 1.38E-91 | yes | up |
| hsa-miR-221-5p | 1.21 | 3.55E-106 | yes | up |
| hsa-miR-330-3p | 1.21 | 3.93E-99 | yes | up |
| hsa-miR-191-5p | 1.2 | 0 | yes | up |
| hsa-miR-15b-3p | 1.2 | 2.69E-11 | yes | up |
| hsa-miR-625-3p | 1.15 | 3.57E-55 | yes | up |
| hsa-miR-5701 | 1.15 | 1.03E-12 | yes | up |
| hsa-miR-23c | 1.15 | 0.00070292 | yes | up |
| hsa-miR-582-5p | 1.14 | 0.00015005 | yes | up |
| hsa-miR-874-3p | 1.13 | 1.15E-10 | yes | up |
| hsa-miR-1292-5p | 1.13 | 1.79E-10 | yes | up |
| hsa-miR-629-3p | 1.12 | 3.05E-08 | yes | up |
| hsa-miR-4746-5p | 1.12 | 0.00024772 | yes | up |
| hsa-miR-3944-3p | 1.12 | 0.0375548 | yes | up |
| hsa-miR-4787-3p | 1.09 | 1.06E-05 | yes | up |
| hsa-miR-27b-3p | 1.07 | 0 | yes | up |
| hsa-miR-423-3p | 1.03 | 0 | yes | up |
| hsa-miR-496 | 1.02 | 0.00224839 | yes | up |
| hsa-miR-30a-5p | 1.01 | 3.05E-179 | yes | up |
| hsa-miR-1287-5p | 1 | 4.02E-09 | yes | up |
| hsa-miR-146b-5p | -1.01 | 1.09E-47 | yes | down |
| hsa-let-7b-5p | -1.02 | 0 | yes | down |
| hsa-miR-412-3p | -1.03 | 1.33E-05 | yes | down |
| hsa-miR-3150a-5p | -1.04 | 0.00079401 | yes | down |
| hsa-miR-22-3p | -1.07 | 0 | yes | down |
| hsa-miR-29c-3p | -1.08 | 0.02682995 | yes | down |
| hsa-miR-4510 | -1.09 | 0.00686605 | yes | down |
| hsa-miR-98-5p | -1.11 | 8.28E-109 | yes | down |
| hsa-miR-1307-5p | -1.11 | 0.03382899 | yes | down |
| hsa-let-7c-5p | -1.12 | 0 | yes | down |
| hsa-miR-3138 | -1.12 | 0.00132999 | yes | down |
| hsa-miR-320a | -1.13 | 0 | yes | down |
| hsa-miR-3177-3p | -1.13 | 0.00053379 | yes | down |
| hsa-miR-3120-3p | -1.13 | 0.03182455 | yes | down |
| hsa-miR-199b-5p | -1.14 | 6.82E-202 | yes | down |
| hsa-miR-329-3p | -1.15 | 3.95E-149 | yes | down |
| hsa-miR-4685-3p | -1.15 | 0.00101732 | yes | down |
| hsa-miR-299-3p | -1.17 | 0.04059582 | yes | down |
| hsa-miR-1180-3p | -1.19 | 0 | yes | down |
| hsa-miR-337-5p | -1.2 | 0.00209381 | yes | down |
| hsa-miR-548f-3p | -1.2 | 0.0024346 | yes | down |
| hsa-let-7d-5p | -1.24 | 0 | yes | down |
| hsa-miR-382-3p | -1.24 | 3.39E-53 | yes | down |
| hsa-miR-628-5p | -1.24 | 5.14E-05 | yes | down |
| hsa-miR-411-5p | -1.26 | 1.57E-212 | yes | down |
| hsa-miR-30d-3p | -1.28 | 5.67E-05 | yes | down |
| hsa-miR-3619-3p | -1.28 | 0.01644027 | yes | down |
| hsa-miR-4741 | -1.29 | 0.00114294 | yes | down |
| hsa-miR-3615 | -1.3 | 0 | yes | down |
| hsa-miR-539-5p | -1.31 | 3.31E-11 | yes | down |
| hsa-miR-15a-5p | -1.31 | 7.36E-09 | yes | down |
| hsa-miR-222-5p | -1.31 | 3.13E-05 | yes | down |
| hsa-miR-106a-5p | -1.31 | 0.00500128 | yes | down |
| hsa-miR-6789-3p | -1.31 | 0.02239457 | yes | down |
| hsa-miR-424-3p | -1.34 | 3.69E-78 | yes | down |
| hsa-miR-122-5p | -1.34 | 1.99E-13 | yes | down |
| hsa-miR-1306-3p | -1.34 | 2.60E-07 | yes | down |
| hsa-miR-143-5p | -1.35 | 6.80E-31 | yes | down |
| hsa-miR-889-3p | -1.35 | 8.76E-28 | yes | down |
| hsa-miR-887-5p | -1.35 | 2.01E-09 | yes | down |
| hsa-miR-378i | -1.37 | 0.04145358 | yes | down |
| hsa-miR-140-5p | -1.4 | 0 | yes | down |
| hsa-miR-4742-3p | -1.4 | 0.00063709 | yes | down |
| hsa-miR-6743-3p | -1.4 | 0.03960894 | yes | down |
| hsa-miR-4683 | -1.41 | 1.97E-27 | yes | down |
| hsa-miR-200b-3p | -1.42 | 2.27E-185 | yes | down |
| hsa-miR-3159 | -1.45 | 0.03787204 | yes | down |
| hsa-miR-125b-1-3p | -1.46 | 0 | yes | down |
| hsa-miR-379-5p | -1.46 | 0 | yes | down |
| hsa-miR-320d | -1.47 | 1.77E-12 | yes | down |
| hsa-miR-499a-5p | -1.47 | 5.43E-06 | yes | down |
| hsa-miR-487b-3p | -1.48 | 4.84E-59 | yes | down |
| hsa-miR-3620-3p | -1.48 | 0.03310811 | yes | down |
| hsa-miR-548e-3p | -1.49 | 3.54E-06 | yes | down |
| hsa-miR-431-3p | -1.5 | 8.07E-32 | yes | down |
| hsa-miR-412-5p | -1.5 | 7.60E-30 | yes | down |
| hsa-miR-487b-5p | -1.51 | 7.91E-07 | yes | down |
| hsa-miR-130a-3p | -1.51 | 2.96E-05 | yes | down |
| hsa-miR-6894-3p | -1.53 | 0.00419451 | yes | down |
| hsa-miR-106b-5p | -1.56 | 3.99E-44 | yes | down |
| hsa-miR-129-1-3p | -1.56 | 0.04038299 | yes | down |
| hsa-miR-92a-1-5p | -1.57 | 2.10E-10 | yes | down |
| hsa-miR-933 | -1.58 | 0.00043676 | yes | down |
| hsa-miR-1276 | -1.59 | 1.58E-05 | yes | down |
| hsa-miR-4429 | -1.59 | 0.01837677 | yes | down |
| hsa-miR-30e-5p | -1.6 | 6.77E-171 | yes | down |
| hsa-miR-196a-5p | -1.62 | 0 | yes | down |
| hsa-miR-330-5p | -1.63 | 5.38E-50 | yes | down |
| hsa-miR-6736-5p | -1.63 | 0.0228099 | yes | down |
| hsa-miR-17-3p | -1.64 | 0.00056237 | yes | down |
| hsa-miR-197-5p | -1.65 | 4.96E-05 | yes | down |
| hsa-miR-651-5p | -1.66 | 9.66E-10 | yes | down |
| hsa-miR-618 | -1.66 | 0.00154166 | yes | down |
| hsa-miR-125a-3p | -1.7 | 1.14E-246 | yes | down |
| hsa-miR-652-3p | -1.7 | 1.32E-74 | yes | down |
| hsa-miR-32-5p | -1.7 | 1.37E-21 | yes | down |
| hsa-miR-378c | -1.7 | 0.0005203 | yes | down |
| hsa-miR-3162-5p | -1.7 | 0.02913607 | yes | down |
| hsa-miR-340-5p | -1.71 | 1.32E-55 | yes | down |
| hsa-miR-655-3p | -1.71 | 1.18E-17 | yes | down |
| hsa-miR-1228-3p | -1.71 | 3.87E-06 | yes | down |
| hsa-miR-6741-3p | -1.72 | 0.0496373 | yes | down |
| hsa-miR-615-5p | -1.74 | 0.03094358 | yes | down |
| hsa-miR-376c-5p | -1.75 | 6.40E-05 | yes | down |
| hsa-miR-3911 | -1.75 | 0.0160073 | yes | down |
| hsa-miR-3609 | -1.76 | 1.17E-18 | yes | down |
| hsa-miR-450b-5p | -1.76 | 0.0021152 | yes | down |
| hsa-miR-29b-1-5p | -1.79 | 1.27E-18 | yes | down |
| hsa-miR-29b-3p | -1.81 | 1.95E-16 | yes | down |
| hsa-miR-19b-3p | -1.81 | 1.28E-05 | yes | down |
| hsa-let-7i-5p | -1.82 | 0 | yes | down |
| hsa-miR-22-5p | -1.82 | 0 | yes | down |
| hsa-miR-541-5p | -1.83 | 3.72E-32 | yes | down |
| hsa-miR-561-5p | -1.84 | 0.03025175 | yes | down |
| hsa-miR-3133 | -1.85 | 1.91E-05 | yes | down |
| hsa-miR-376b-5p | -1.85 | 0.00199151 | yes | down |
| hsa-miR-92b-5p | -1.86 | 2.95E-285 | yes | down |
| hsa-miR-320c | -1.86 | 6.49E-126 | yes | down |
| hsa-miR-323a-5p | -1.87 | 4.39E-24 | yes | down |
| hsa-miR-6786-3p | -1.87 | 1.37E-06 | yes | down |
| hsa-miR-6808-3p | -1.89 | 0.00885264 | yes | down |
| hsa-miR-6803-3p | -1.92 | 0.000172 | yes | down |
| hsa-miR-136-5p | -1.93 | 6.47E-43 | yes | down |
| hsa-miR-141-3p | -1.94 | 4.77E-22 | yes | down |
| hsa-miR-203a-3p | -1.96 | 4.25E-13 | yes | down |
| hsa-miR-212-3p | -1.97 | 8.11E-05 | yes | down |
| hsa-miR-2276-3p | -1.98 | 0.00271101 | yes | down |
| hsa-miR-6726-3p | -1.99 | 0.00076173 | yes | down |
| hsa-miR-6793-3p | -1.99 | 0.03212739 | yes | down |
| hsa-miR-664a-5p | -2 | 0.00549674 | yes | down |
| hsa-miR-3129-5p | -2.01 | 0.01571787 | yes | down |
| hsa-miR-6820-3p | -2.01 | 0.02942351 | yes | down |
| hsa-miR-503-5p | -2.02 | 6.15E-58 | yes | down |
| hsa-miR-3180 | -2.02 | 1.38E-43 | yes | down |
| hsa-miR-3180-3p | -2.02 | 1.38E-43 | yes | down |
| hsa-miR-24-1-5p | -2.04 | 6.95E-104 | yes | down |
| hsa-miR-144-3p | -2.05 | 4.81E-05 | yes | down |
| hsa-miR-382-5p | -2.07 | 0 | yes | down |
| hsa-miR-3065-5p | -2.09 | 1.23E-05 | yes | down |
| hsa-miR-432-5p | -2.11 | 0 | yes | down |
| hsa-miR-143-3p | -2.12 | 0 | yes | down |
| hsa-miR-1245b-5p | -2.14 | 0.01711264 | yes | down |
| hsa-miR-548am-3p | -2.16 | 7.27E-05 | yes | down |
| hsa-miR-320b | -2.17 | 0 | yes | down |
| hsa-miR-18a-5p | -2.17 | 4.37E-08 | yes | down |
| hsa-miR-548ay-3p | -2.19 | 0.00177021 | yes | down |
| hsa-miR-625-5p | -2.2 | 7.50E-15 | yes | down |
| hsa-miR-6734-3p | -2.2 | 0.00138867 | yes | down |
| hsa-miR-1228-5p | -2.22 | 5.33E-05 | yes | down |
| hsa-miR-487a-5p | -2.23 | 2.09E-101 | yes | down |
| hsa-miR-485-5p | -2.25 | 0 | yes | down |
| hsa-miR-656-3p | -2.27 | 8.29E-47 | yes | down |
| hsa-miR-374a-3p | -2.27 | 1.51E-30 | yes | down |
| hsa-miR-101-3p | -2.28 | 0 | yes | down |
| hsa-miR-6788-3p | -2.29 | 5.66E-19 | yes | down |
| hsa-miR-6827-3p | -2.31 | 0.00046597 | yes | down |
| hsa-miR-3180-5p | -2.32 | 7.20E-23 | yes | down |
| hsa-miR-3913-5p | -2.34 | 6.09E-06 | yes | down |
| hsa-miR-200a-3p | -2.35 | 3.72E-162 | yes | down |
| hsa-miR-449a | -2.37 | 0.03992259 | yes | down |
| hsa-miR-433-3p | -2.39 | 1.91E-116 | yes | down |
| hsa-miR-324-5p | -2.39 | 2.50E-15 | yes | down |
| hsa-miR-20b-5p | -2.4 | 2.42E-07 | yes | down |
| hsa-miR-95-3p | -2.41 | 2.65E-19 | yes | down |
| hsa-miR-200a-5p | -2.45 | 1.07E-33 | yes | down |
| hsa-miR-34c-5p | -2.48 | 1.44E-131 | yes | down |
| hsa-miR-4773 | -2.48 | 4.32E-10 | yes | down |
| hsa-miR-380-5p | -2.49 | 8.39E-07 | yes | down |
| hsa-miR-4479 | -2.49 | 0.01785613 | yes | down |
| hsa-miR-204-5p | -2.5 | 3.66E-06 | yes | down |
| hsa-miR-6892-5p | -2.5 | 0.00381508 | yes | down |
| hsa-miR-429 | -2.54 | 1.54E-51 | yes | down |
| hsa-miR-363-3p | -2.54 | 2.22E-32 | yes | down |
| hsa-miR-760 | -2.56 | 1.74E-191 | yes | down |
| hsa-miR-548a-3p | -2.57 | 3.66E-05 | yes | down |
| hsa-miR-200c-3p | -2.58 | 0 | yes | down |
| hsa-miR-32-3p | -2.58 | 8.05E-07 | yes | down |
| hsa-miR-1271-3p | -2.59 | 0.04724317 | yes | down |
| hsa-miR-3191-3p | -2.6 | 0.01025389 | yes | down |
| hsa-miR-23a-5p | -2.67 | 1.93E-18 | yes | down |
| hsa-miR-4697-3p | -2.69 | 7.57E-08 | yes | down |
| hsa-miR-543 | -2.7 | 0 | yes | down |
| hsa-miR-495-3p | -2.73 | 1.20E-105 | yes | down |
| hsa-miR-182-5p | -2.74 | 4.57E-47 | yes | down |
| hsa-miR-4745-3p | -2.75 | 0.0051606 | yes | down |
| hsa-miR-146a-5p | -2.77 | 2.54E-242 | yes | down |
| hsa-miR-137 | -2.8 | 0.00065583 | yes | down |
| hsa-miR-223-3p | -2.81 | 7.77E-16 | yes | down |
| hsa-miR-1233-3p | -2.82 | 0.00264775 | yes | down |
| hsa-miR-200b-5p | -2.91 | 7.31E-15 | yes | down |
| hsa-miR-135b-5p | -2.92 | 1.75E-18 | yes | down |
| hsa-miR-6769b-3p | -2.93 | 1.09E-05 | yes | down |
| hsa-miR-5193 | -2.97 | 1.41E-28 | yes | down |
| hsa-miR-6869-5p | -2.98 | 0.01114222 | yes | down |
| hsa-miR-652-5p | -3.01 | 0.00035475 | yes | down |
| hsa-miR-450a-5p | -3.04 | 1.53E-102 | yes | down |
| hsa-miR-135b-3p | -3.04 | 0.04473169 | yes | down |
| hsa-miR-6735-5p | -3.05 | 0.00251497 | yes | down |
| hsa-miR-708-3p | -3.07 | 7.67E-16 | yes | down |
| hsa-miR-424-5p | -3.07 | 8.01E-05 | yes | down |
| hsa-miR-4687-5p | -3.11 | 8.57E-10 | yes | down |
| hsa-miR-6819-3p | -3.13 | 0.00030663 | yes | down |
| hsa-miR-4632-3p | -3.15 | 0.01114056 | yes | down |
| hsa-miR-4767 | -3.17 | 2.96E-08 | yes | down |
| hsa-miR-377-3p | -3.2 | 3.03E-41 | yes | down |
| hsa-miR-3164 | -3.2 | 0.0003268 | yes | down |
| hsa-miR-6747-3p | -3.24 | 4.59E-20 | yes | down |
| hsa-miR-6501-5p | -3.25 | 0.02487686 | yes | down |
| hsa-miR-374c-5p | -3.27 | 0.00057109 | yes | down |
| hsa-miR-96-5p | -3.3 | 2.85E-82 | yes | down |
| hsa-miR-4731-5p | -3.33 | 4.49E-10 | yes | down |
| hsa-miR-6780a-5p | -3.34 | 7.00E-07 | yes | down |
| hsa-miR-150-5p | -3.36 | 4.70E-42 | yes | down |
| hsa-miR-6798-3p | -3.4 | 0.00601549 | yes | down |
| hsa-miR-708-5p | -3.41 | 6.52E-68 | yes | down |
| hsa-miR-3144-3p | -3.41 | 0.00057962 | yes | down |
| hsa-miR-4651 | -3.41 | 0.01036571 | yes | down |
| hsa-miR-6854-5p | -3.42 | 0.00543815 | yes | down |
| hsa-miR-1229-3p | -3.43 | 3.38E-11 | yes | down |
| hsa-miR-193a-3p | -3.48 | 0.0056229 | yes | down |
| hsa-miR-4436b-3p | -3.48 | 0.0056229 | yes | down |
| hsa-miR-300 | -3.54 | 0.01021285 | yes | down |
| hsa-miR-6762-3p | -3.57 | 0.00567557 | yes | down |
| hsa-miR-6727-5p | -3.58 | 4.12E-05 | yes | down |
| hsa-miR-183-5p | -3.6 | 2.38E-15 | yes | down |
| hsa-miR-320e | -3.6 | 4.69E-05 | yes | down |
| hsa-let-7i-3p | -3.63 | 2.33E-195 | yes | down |
| hsa-miR-1268a | -3.67 | 7.16E-34 | yes | down |
| hsa-miR-1268b | -3.67 | 7.16E-34 | yes | down |
| hsa-miR-885-5p | -3.71 | 2.90E-09 | yes | down |
| hsa-miR-4753-5p | -3.75 | 0.00014489 | yes | down |
| hsa-miR-6837-3p | -3.75 | 0.00284512 | yes | down |
| hsa-miR-4763-5p | -3.76 | 2.80E-11 | yes | down |
| hsa-miR-142-5p | -3.87 | 5.36E-167 | yes | down |
| hsa-miR-3614-5p | -3.95 | 4.66E-37 | yes | down |
| hsa-miR-6881-3p | -3.99 | 0.00059157 | yes | down |
| hsa-miR-155-5p | -4.06 | 0 | yes | down |
| hsa-miR-4657 | -4.13 | 3.37E-05 | yes | down |
| hsa-miR-6793-5p | -4.15 | 6.34E-05 | yes | down |
| hsa-miR-4697-5p | -4.28 | 2.26E-16 | yes | down |
| hsa-miR-4800-3p | -4.29 | 3.42E-05 | yes | down |
| hsa-miR-6770-5p | -4.33 | 0.00014093 | yes | down |
| hsa-miR-4742-5p | -4.55 | 8.36E-06 | yes | down |
| hsa-miR-3161 | -4.56 | 8.11E-06 | yes | down |
| hsa-miR-376a-2-5p | -4.68 | 9.82E-07 | yes | down |
| hsa-miR-5699-3p | -4.94 | 1.01E-06 | yes | down |
| hsa-miR-4466 | -5.02 | 8.20E-28 | yes | down |
| hsa-miR-9-5p | -5.03 | 0 | yes | down |
| hsa-miR-142-3p | -5.19 | 1.83E-163 | yes | down |
| hsa-miR-4745-5p | -5.38 | 3.17E-10 | yes | down |
| hsa-miR-147b | -5.39 | 3.94E-275 | yes | down |
| hsa-miR-184 | -6.65 | 0.00950363 | yes | down |
| hsa-miR-205-5p | -6.73 | 0 | yes | down |
| hsa-miR-5189-5p | -6.91 | 0.00968114 | yes | down |
| hsa-miR-6767-5p | -6.98 | 0.00494988 | yes | down |
| hsa-miR-6852-3p | -6.99 | 0.01002216 | yes | down |
| hsa-miR-548b-5p | -7.01 | 0.00482976 | yes | down |
| hsa-miR-4637 | -7.03 | 0.0021692 | yes | down |
| hsa-miR-4726-5p | -7.05 | 0.00471263 | yes | down |
| hsa-miR-7845-5p | -7.06 | 0.00211746 | yes | down |
| hsa-miR-329-5p | -7.08 | 0.00459839 | yes | down |
| hsa-miR-6865-3p | -7.12 | 0.00448698 | yes | down |
| hsa-miR-204-3p | -7.13 | 0.00218958 | yes | down |
| hsa-miR-6715b-3p | -7.15 | 0.00475762 | yes | down |
| hsa-miR-3160-3p | -7.23 | 0.00221015 | yes | down |
| hsa-miR-765 | -7.34 | 0.00109872 | yes | down |
| hsa-miR-4700-3p | -7.4 | 0.00104841 | yes | down |
| hsa-miR-374c-3p | -7.4 | 0.00113653 | yes | down |
| hsa-miR-6868-3p | -7.47 | 0.00053881 | yes | down |
| hsa-miR-873-3p | -7.51 | 0.00112004 | yes | down |
| hsa-miR-219a-2-3p | -7.57 | 0.00049047 | yes | down |
| hsa-miR-5010-5p | -7.6 | 0.00056221 | yes | down |
| hsa-miR-6756-3p | -7.61 | 0.00110295 | yes | down |
| hsa-miR-6813-5p | -7.69 | 0.00051173 | yes | down |
| hsa-miR-16-1-3p | -7.8 | 6.69E-05 | yes | down |
| hsa-miR-101-5p | -7.89 | 0.0001265 | yes | down |
| hsa-miR-1264 | -7.93 | 0.0001305 | yes | down |
| hsa-miR-450a-2-3p | -7.94 | 6.66E-05 | yes | down |
| hsa-miR-6809-3p | -7.94 | 6.66E-05 | yes | down |
| hsa-miR-4779 | -7.95 | 6.02E-05 | yes | down |
| hsa-miR-3125 | -7.98 | 3.03E-05 | yes | down |
| hsa-miR-577 | -8.01 | 6.56E-05 | yes | down |
| hsa-miR-6850-5p | -8.1 | 1.59E-05 | yes | down |
| hsa-miR-2113 | -8.15 | 3.35E-05 | yes | down |
| hsa-miR-103a-2-5p | -8.19 | 7.43E-06 | yes | down |
| hsa-miR-3181 | -8.24 | 4.33E-06 | yes | down |
| hsa-miR-6754-3p | -8.34 | 2.15E-06 | yes | down |
| hsa-miR-5699-5p | -8.43 | 1.16E-06 | yes | down |
| hsa-miR-937-5p | -8.45 | 2.25E-06 | yes | down |
| hsa-miR-6822-5p | -8.5 | 5.55E-07 | yes | down |
| hsa-miR-1911-3p | -8.64 | 6.29E-07 | yes | down |
| hsa-miR-141-5p | -8.72 | 1.75E-07 | yes | down |
| hsa-miR-944 | -8.77 | 8.50E-08 | yes | down |
| hsa-miR-5571-3p | -9.1 | 2.03E-09 | yes | down |
| hsa-miR-889-5p | -9.8 | 3.48E-14 | yes | down |
| hsa-miR-9-3p | -10.69 | 2.53E-23 | yes | down |
| hsa-miR-1298-3p | -11 | 4.41E-27 | yes | down |
| hsa-miR-448 | -12.72 | 1.48E-71 | yes | down |
| hsa-miR-1911-5p | -12.72 | 1.60E-70 | yes | down |
| hsa-miR-1298-5p | -13.3 | 0 | yes | down |
