# Supplementary material
Source: HighWire-hosted journal article supplement (https://ard.bmj.com/content/78/6/826)
Supplement: inline-supplementary-material-15 [file inline-supplementary-material-15.docx]

| Supplementary Table S5 | | | | |
| --- | --- | --- | --- | --- |
| Control | | | | |
| 3 paired clinical OA and control tissues for circRNA deep sequencing | | | | |
| Gender | Age（year） | Height（cm） | Weight（kg） | BMI |
| Male | 60 | 169 | 78 | 27.3099 |
| Male | 62 | 170 | 62 | 21.4532 |
| Female | 62 | 160 | 60 | 23.4375 |
|  |  |  |  |  |
| 10 paired clinical OA and control tissues for qPCR Validation | | | | |
| Gender | Age（year） | Height（cm） | Weight（kg） | BMI |
| Female | 66 | 155 | 55 | 22.8928 |
| Male | 67 | 160 | 60 | 23.4375 |
| Female | 50 | 166 | 56.5 | 20.5037 |
| Female | 67 | 155 | 70 | 29.1363 |
| Male | 66 | 155 | 53 | 22.0603 |
| Female | 69 | 150 | 41 | 18.2222 |
| Female | 68 | 155 | 59 | 24.5577 |
| Female | 68 | 158 | 54 | 21.6311 |
| Female | 69 | 153 | 65 | 27.7670 |
| Female | 70 | 162 | 62.5 | 23.8149 |
|  |  |  |  |  |
| All 30 paired clinical OA and control tissues for this research | | | | |
| Gender | Age（year） | Height（cm） | Weight（kg） | BMI |
| Male | 66 | 155 | 53 | 22.0603 |
| Female | 71 | 169 | 68 | 23.8086 |
| Female | 69 | 153 | 65 | 27.7671 |
| Female | 72 | 160 | 72 | 28.125 |
| Female | 71 | 170 | 63 | 21.7993 |
| Female | 69 | 159 | 48 | 18.9865 |
| Male | 60 | 169 | 78 | 27.3099 |
| Female | 70 | 162 | 62.5 | 23.8149 |
| Female | 67 | 155 | 70 | 29.1363 |
| Female | 66 | 155 | 55 | 22.8928 |
| Male | 62 | 170 | 62 | 21.4533 |
| Female | 62 | 160 | 60 | 23.4375 |
| Male | 67 | 160 | 60 | 23.4375 |
| Female | 52 | 160 | 52.2 | 20.3906 |
| Female | 50 | 166 | 56.5 | 20.5037 |
| Female | 69 | 150 | 41 | 18.2222 |
| Female | 74 | 164 | 65 | 24.1672 |
| Female | 68 | 154 | 50 | 21.0828 |
| Female | 60 | 164 | 55 | 20.4491 |
| Female | 70 | 160 | 35 | 13.6719 |
| Male | 69 | 168 | 52 | 18.4240 |
| Female | 60 | 163 | 60 | 22.5827 |
| Female | 68 | 155 | 59 | 24.5578 |
| Male | 67 | 164 | 50 | 18.5901 |
| Female | 72 | 173 | 70 | 23.3887 |
| Female | 68 | 158 | 54 | 21.6311 |
| Female | 69 | 158 | 53 | 21.2306 |
| Female | 61 | 156 | 60 | 24.6548 |
| Male | 65 | 172 | 74 | 25.0135 |
| Male | 69 | 173 | 80 | 26.7299 |

| OA | | | | |
| --- | --- | --- | --- | --- |
| 3 paired clinical OA and control tissues for circRNA deep sequencing | | | | |
| Gender | Age（year） | Height（cm） | Weight（kg） | BMI |
| Male | 61 | 170 | 72 | 24.9135 |
| Male | 61 | 168 | 58 | 20.5499 |
| Female | 60 | 160 | 65 | 25.3906 |
|  |  |  |  |  |
| 10 paired clinical OA and control tissues for qPCR Validation | | | | |
| Gender | Age（year） | Height（cm） | Weight（kg） | BMI |
| Male | 61 | 174 | 82 | 27.0842 |
| Male | 73 | 165 | 60 | 22.0386 |
| Female | 62 | 155 | 67 | 27.8876 |
| Female | 60 | 153 | 68 | 29.0487 |
| Female | 64 | 160 | 53 | 20.7031 |
| Male | 70 | 178 | 65 | 20.5151 |
| Female | 67 | 162 | 67 | 25.5296 |
| Female | 73 | 158 | 73 | 29.2421 |
| Male | 70 | 175 | 81 | 26.4489 |
| Female | 72 | 160 | 60 | 23.4375 |
|  |  |  |  |  |
| All 30 paired clinical OA and control tissues for this research | | | | |
| Gender | Age（year） | Height（cm） | Weight（kg） | BMI |
| Female | 62 | 155 | 67 | 27.8876 |
| Female | 67 | 157 | 51 | 20.6905 |
| Female | 60 | 153 | 68 | 29.0487 |
| Female | 63 | 160 | 45 | 17.5781 |
| Male | 73 | 165 | 60 | 22.0386 |
| Male | 61 | 168 | 58 | 20.5499 |
| Female | 64 | 160 | 53 | 20.7031 |
| Female | 60 | 160 | 65 | 25.3906 |
| Male | 70 | 175 | 81 | 26.449 |
| Female | 67 | 162 | 67 | 25.5296 |
| Male | 52 | 165 | 71 | 26.079 |
| Female | 67 | 150 | 55 | 24.4444 |
| Male | 61 | 174 | 82 | 27.0842 |
| Female | 73 | 158 | 73 | 29.2421 |
| Female | 74 | 155 | 52 | 21.6441 |
| Male | 71 | 163 | 61 | 22.9591 |
| Male | 70 | 178 | 65 | 20.5151 |
| Male | 72 | 170 | 80 | 27.6817 |
| Female | 72 | 160 | 60 | 23.4375 |
| Male | 63 | 173 | 77 | 25.7276 |
| Female | 65 | 163 | 73 | 27.4756 |
| Male | 66 | 160 | 53 | 20.7031 |
| Male | 79 | 164 | 61 | 22.68 |
| Female | 58 | 156 | 65 | 26.7094 |
| Female | 72 | 160 | 56 | 21.875 |
| Male | 71 | 160 | 49 | 19.1406 |
| Female | 65 | 157 | 55 | 22.3133 |
| Female | 71 | 150 | 38.5 | 17.1111 |
| Male | 61 | 170 | 72 | 24.9135 |
| Male | 68 | 166 | 65 | 23.5883 |
